# Supplementary material
Source: MDPI journal article supplement (https://www.mdpi.com/1996-1073/13/23/6189)
Supplement: s1 [file s1]

## Sheet: Clasificación
Title	System Where it was Focused									Did you take into account the DG? What type?				Did you take into account the Load? What type?				Did you take into account the ESS? What type?		What Technique Did They Use?			What reliability indices did they calculate?									What test system was used?				Document Type			Types of Publications		Journal Name	Year	Country
	CPS	SG	MG	GD	Load	ESS	PS	CS	ICTS	PV	WTG	CEG	Others	Residential	Commercial	Industrial	Others	Batteries	Electric Vehicles	Analytical	MCS		SAIFI	SAIDI	CAIFI	CAIDI	ASAI	ENS	AENS	EENS	Others	IEEE-RTS	RBTS	Real	Others	Journal Article	Conference proceedings	Book	Articles	Reviews
																					SMCS	NSMCS
Enhancing smart grid with microgrids: Challenges and opportunities			X																																	X				X	Renewable and Sustainable Energy Reviews	2017	Turkey, Australia and Greece
Reliability Assessment of Distribution Systems Considering Telecontrolled Switches and Microgrids	X		X						X											X			X	X											X	X			X		IEEE Transactions on Power Systems	2014	Italy and Canada
Reliability assessment in smart distribution networks		X		X				X	X	X	X										X		X	X										X		X			X		Electric Power Systems Research	2012	Italy
Key Connections			X																																	X				X	IEEE Power and Energy Magazine	2013	USA
Recent advancements on the development of microgrids			X																																	X				X	Journal of Modern Power Systems and Clean Energy	2014	China
Microgrids: Experiences, barriers and success factors			X																																	X				X	Renewable and Sustainable Energy Reviews	2014	Netherlands and Denmark
Microgrids: Architectures, Controls, Protection, and Demonstration			X				X	X																												X				X	Electric Power Components and Systems	2015	USA
A review of AC/DC microgrid-developments, technologies, and challenges			X																																		X			X	2015 IEEE Green Energy and Systems Conference (IGESC)	2015	USA
Microgrids: A review of technologies, key drivers, and outstanding issues			X																																	X				X	Renewable and Sustainable Energy Reviews	2018	Israel, Denmark
A comprehensive review on issues, investigations, control and protection trends, technical challenges and future directions for Microgrid technology			X																																	X				X	International Transactions on Electrical Energy Systems	2020	India
BIBLIOGRAPHY ON THE APPLICATION OF PROBABILITY METHODS IN POWER SYSTEM RELIABILITY EVALUATION	X																																				X			X	IEEE Winter Power Meeting	1971	Canada
BIBLIOGRAPHY ON THE APPLICATION OF PROBABILITY METHODS IN POWER SYSTEM RELIABILITY EVALUATION	X																																			X				X	IEEE Transactions on Power Systems	1988	Canada, England and USA
BIBLIPGRAPHY ON THE APPLICATION OF PROBABILITY METHODS IN POWER SYSTEM RELIABILITY EVALUATION	X																																			X				X	IEEE Transactions on Power Systems	1994	Canada, England and USA
BIBLIOGRAPHY ON THE APPLICATION OF PROBABILITY METHODS IN POWER SYSTEM RELIABILITY EVALUATION	X																																			X				X	IEEE Transactions on Power Systems	1999	Canada, England and USA
Bibliography on the Application of Probability Methods in Power System Reliability Evaluation 1996–1999	X																																			X				X	IEEE Transactions on Power Systems	2001	Canada and Sweden
Reliability based power systems planning and operation with wind power integration: A review to models, algorithms and applications	X																																			X				X	Renewable and Sustainable Energy Reviews	2014	China
An overview of reliability models and methods for distribution systems with renewable energy distributed generation	X																																			X				X	Renewable and Sustainable Energy Reviews	2012	Brazil
Impacts of energy storage system on power system reliability: A systematic review	X					X																														X				X	Energies	2018	Malaysia
A holistic analysis of distribution system reliability assessment methods with conventional and renewable energy sources	X		X	X																																X				X	AIMS Energy	2019	Ethopia and Syria
A survey of reliability assessment techniques for modern distribution networks	X		X	X																																X					Renewable and Sustainable Energy Reviews	2018	Spain and Ireland
New Computational Methods in Power System Reliability	X																																					X				2011
Simulation Methods for Reliability and Availability of Complex Systems																																						X				2010
Reliability Assessement of Electric Power Systems Using Monte Carlo Methods	X																																					X				1994	Canada
Reliability Evaluation of Power Systems	X																																					X				1994	Canada and England
Reliability Evaluation of Engineering Systems	X																																					X				1992	Canada and England
Reliability Modeling, Prediction, and Optimization																																						X				2000
Smart Grid Self-Healing: Functions, Applications, and Developments		X																																			X			X	2015 First Workshop on Smart Grid and Renewable Energy (SGRE)	2015	Egypt and Qatar
The smart grid - State-of-the-art and future trends		X																																		X				X	Electric Power Components and Systems	2014	Canada
An instrumentation engineer's review on smart grid: Critical applications and parameters		X																																		X				X	Renewable and Sustainable Energy Reviews	2014	India
Challenges in the smart grid applications: An overview		X																																		X				X	International Journal of Distributed Sensor Networks	2014	Canada and USA
European smart grid prospects, policies, and challenges		X																																		X				X	Renewable and Sustainable Energy Reviews	2017	Malaysia
Initiatives and technical challenges in smart distribution grid		X																																		X				X	Renewable and Sustainable Energy Reviews	2016	India
Smart grid challenges, issues and solutions		X																																			X			X	2014 International Conference on Intelligent Green Building and Smart Grid (IGBSG)	2014	India
Microgrid: A conceptual solution			X																																		X			X	2004 35th Annual IEEE Annual Power Electronics Specialists Conference	2004	USA
Smart distribution: Coupled microgrids			X																																		X			X	2011 Proceedings of the IEEE	2011	USA
Modeling and reliability assessment of microgrids including renewable distributed generation			X	X	X					X	X		X	X	X	X					X							X						X			X		X		EEEIC 2016 - International Conference on Environment and Electrical Engineering	2016
The community microgrid distribution system of the future			X																																	X				X	The Electricity Journal	2016	USA
Integration of high reliability distribution system in microgrid operation			X	X	X	X				X	X							X			X		X	X		X					X			X		X			X		IEEE Transactions on Smart Grid	2012	USA
Reliability evaluation of multi-microgrids considering optimal operation of small scale energy zones under load-generation uncertainties			X	X	X	X															X										X				X	X			X		International Journal of Electrical Power and Energy Systems	2016	Iran
Hybrid ac/dc microgrids - Part I: Review and classification of topologies			X																																	X				X	Renewable and Sustainable Energy Reviews	2015	Spain
AC-microgrids versus DC-microgrids with distributed energy resources: A review			X																																	X				X	Renewable and Sustainable Energy Reviews	2013	South Korea
AC and DC technology in microgrids: A review			X																																	X				X	Renewable and Sustainable Energy Reviews	2015	Spain
Microgrid architectures for low voltage distributed generation			X																																	X				X	Renewable and Sustainable Energy Reviews	2015	Spain
DC Microgrids — Part II : A Review of Power Architectures , Applications , and Standardization Issues			X																																	X				X	IEEE Transactions on Power Electronics	2016	Denmark and USA
Distributed generation: A definition				X																																X				X	Electric Power Systems Research	2001	Sweden and Switzerland
Reliability Assessment of Distribution System with Renewable Distributed Generation	X			X	X	X				X								X		X	X		X	X		X	X	X	X				X				X		X		2016 Biennial International Conference on Power and Energy Systems: Towards Sustainable Energy	2016	India
Battery-supercapacitor hybrid energy storage system in standalone DC microgrids: a review						X																														X				X	IET Renewable Power Generation	2017	Malaysia
A critical review of AC Microgrid protection issues and available solutions			X				X																													X				X	Electric Power Systems Research	2015	Finland
A review on issues and approaches for microgrid protection			X				X																													X				X	Renewable and Sustainable Energy Reviews	2017	India
Adaptive intelligent techniques for microgrid control systems: A survey			X					X																												X				X	International Journal of Electrical Power and Energy Systems	2017	Saudi Arabia and Canada
A survey on control of electric power distributed generation systems for microgrid applications			X					X																												X				X	Renewable and Sustainable Energy Reviews	2015	Algeria, Canada and Denmark
A failure to communicate: next generation communication requirements, technologies, and architecture for the electric power grid			X						X																												X			X	IEEE Power and Energy Magazine	2005	USA
Cellular Communications for Smart Grid Neighborhood Area Networks : A Survey		X							X																											X				X	IEEE Access	2016	Spain and Sweden
Smart grid challenges, issues and solutions		X																																		X				X	2014 International Conference on Intelligent Green Building and Smart Grid (IGBSG)	2014	India
Distribution System Reliability Analysis for Smart Grid Applications		X		X			X													X			X	X		X	X					X				X			X		Smart Grid and Renewable Energy	2017	USA
Matlab Code to Assess the Reliability of the Smart Power Distribution System Using Monte Carlo Simulation		X		X			X														X		X	X		X	X					X				X			X		Smart Grid and Renewable Energy	2017	USA
Non-Sequential Monte Carlo Simulation for Cyber-Induced Dependent Failures in Composite Power System Reliability Evaluation	X	X							X													X								X	X		X			X			X		IEEE Transactions on Power Systems	2017	USA
A preliminary study of power system reliability considering cloud service reliability		X							X													X								X		X					X		X		2014 International Conference on Power System Technology	2014	USA
Customer satisfaction based reliability evaluation of active distribution networks		X		X						X	X	X									X		X							X	X		X			X			X		Applied Energy	2016	China
Method of evaluating reliability of microgrids in Island mode by using load prioritization			X	X	X	X								X						X			X	X	X								X				X		X		2014 19th Conference on Electrical Power Distribution Networks, EPDC 2014	2014	Iran
Optimum microgrid design for enhancing reliability and supply-security			X																																	X			X		IEEE Transactions on Smart Grid	2013	Canada
Reliability Evaluation In Multi Microgrids Under Probabilistic Optimum Operation Using Heuristic Algorithm			X																																		X		X		2015 Smart Grids Conference (SGC)	2015	Iran
A new approach to transform an existing distribution network into a set of micro-grids for enhancing reliability and sustainability			X																																	X			X		Applied Soft Computing Journal	2017	Germany and Iran
Researches on the Reliability Evaluation of Integrated Energy System Based on Energy Hub			X																																		X		X		2016 China international Conference on Electricity Distribution (CIDED 2016)	2016	China
Reliability of Distribution Networks with Microgrids			X	X	X															X			X	X			X	X							X		X		X		2005 IEEE Russia Power Tech, PowerTech	2005	Portugal
Generalized systematic approach to assess distribution system reliability with renewable distributed generators and microgrids			X	X	X															X			X	X									X			X			X		IEEE Transactions on Power Delivery	2012	Italy
Contribution of Microgrids to distribution network reliability			X	X																	X													X			X		X		015 IEEE Eindhoven PowerTech, PowerTech 2015	2015	England
Reliability Improvement of Radial Distribution Systems Using Microgrids placed on Distributors			X	X																X			X	X			X	X					X				X		X		2015 Conference on Power, Control, Communication and Computational Technologies for Sustainable Growth (PCCCTSG)	2015	India
A Scenario Driven Reliability Assessment Approach for Microgrids			X	X		X																	X	X						X				X			X		X		2013 IEEE	2013	Germany and USA
RELIABILITY EVALUATION OF MICROGRID CLUSTER BASED ON MONTE-CARLO HIERARCHICAL DYNAMIC RELIABILITY MODEL			X	X	X	X															X								X	X				X			X		X		10th International Conference on Advances in Power System Control, Operation & Management (APSCOM 2015)	2015	China
Optimal placement and sizing of microgrids in composite reliability of a deregulated power system			X	X	X	X															X							X		X		X	X			X			X		International Journal of Critical Infrastructures	2016	USA
Monte Carlo simulation by using a systematic approach to assess distribution system reliability considering intentional islanding			X		X																X		X	X										X		X			X		IEEE Transactions on Power Delivery	2015	Italy
Reliability evaluation based on Monte Carlo simulation considering islanded operation in distribution network with micogrid			X	X	X																X		X	X								X	X				X		X		IET Conference Publications	2015	China
Reliability evaluation of distribution system containing microgrid			X	X	X	X															X		X	X			X			X		X	X				X		X		CICED 2010 Proceedings	2010	China
Optimal planning of stand-alone microgrids incorporating reliability			X	X	X	X														X											X				X		X		X		Journal of Modern Power Systems and Clean Energy	2014	China
Reliability evaluation of a microgrid considering its operating condition			X	X																X			X	X			X	X	X						X	X			X		Journal of Electrical Engineering and Technology	2016	USA and China
New metrics for assessing the reliability and economics of microgrids in distribution system			X	X	X	X															X										X		X			X			X		IEEE Transactions on Power Systems	2013	USA and China
Assessing the contribution of microgrids to the reliability of distribution networks			X	X	X					X										X			X	X	X		X	X			X				X	X			X		Electric Power Systems Research	2009	Portugal
Reliability Evaluation and Improvement of Islanded Microgrid Considering Operation Failures of Power Electronic Equipment			X	X	X	X														X			X	X				X							X	X			X		Journal of Modern Power Systems and Clean Energy	2020	USA and China
A reliability evaluation method for radial multi-microgrid systems considering distribution network transmission capacity			X	X	X	X														X											X				X	X			X		Computers and Industrial Engineering	2020	China
Using microgrids featuring PV panels and batteries connected to the grid to improve the reliability of a low-voltage feeder in Kinshasa			X	X	X	X														X								X		X				X			X		X		Energy Procedia	2019	Belgium
Reliability Assessment of Microgrids With Local and Mobile Generation, Time-Dependent Profiles, and Intraday Reconfiguration			X	X	X	X															X							X						X		X			X		IEEE Transactions on Industry Applications	2018	Spain, Italy and Romania
Multi-microgrids system reliability assessment algorithm considering energy dispatch strategy among microgrids			X	X	X	X														X			X	X			X	X							X		X		X		Energy Procedia	2018	China
Multi-microgrids System Reliability Assessment Considering Difference Characteristics and Inter-connection Ability Among Microgrids			X	X	X	X																	X	X				X								X			X		Journal of Electrical Engineering and Technology	2019	China
A Comparison of Microgrid Topologies Considering Both Market Operations and Reliability			X	Reliability Assessment of Microgrids Architectures																	X										X				X	X			X		Electric Power Components and Systems	2014	Korea and Vietnam
Reliability Assessment of Micro-grid Based on Markov Model			X	X	X	X				X	X									X											X				X		X		X		2016 IEEE PES Asia-Paeifie Power and Energy Conferenee	2016	China
Reliability evaluation of distribution systems containing renewable distributed generations			X	X	X	X				X	X												X	X						X			X				X		X		North American Power Symposium(NAPS), 2012	2012	USA
Reliability and cost-benefits of adding alternate power sources to an independent micro-grid community			X	X	X	X				X	X										X										X				X	X			X		Journal of Power Sources	2005	Turkey
Optimum generation dispatching of distributed resources in smart grids			X	X						X	X									X			X							X	X				X	X			X		INTERNATIONAL TRANSACTIONS ON ELECTRICAL ENERGY SYSTEMS	2014	Iran
Reliability assessment for components of large scale photovoltaic systems																																				X			X		Journal of Power Sources	2014	Iran
A framework for the reliability evaluation of grid-connected photovoltaic systems in the presence of intermittent faults				X						X										X																X			X		Energy	2015	China
Effect of Distributed Generation on Power Supply Reliability of Distribution Network																																					X		X		2015 8th International Conference on Grid and Distributed Computing (GDC)	2015	China
Reliability modeling of distributed generation in conventional distribution systems planning and analysis	X			X																	X		X	X	X				X						X		X		X		Conference Record of the 2002 IEEE Industry Applications Conference. 37th IAS Annual Meeting	2002	USA and Canada
Reliability evaluation and enhancement of distribution systems in the presence of distributed generation based on standby mode	X			X																X			X	X	X				X	X					X	X			X		International Journal of Electrical Power and Energy Systems	2012	India
Reliable power supply capability analysis for electric distribution network including distributed generations based on probabilistic reliability	X			X																										X					X		X		X		2016 IEEE 7th International Symposium on Power Electronics for Distributed Generation Systems, PEDG	2016	China and Canada
Reliability assessment of distribution network considering the randomness of distributed generation	X			X	X					X	X										X		X	X			X			X			X				X		X		international Conference on Electricity Distribution	2016	China
Probabilistic reliability evaluation for power systems with high penetration of renewable power generation	X			X	X					X	X	X								X										X				X			X		X		2017 IEEE International Conference on Industrial Technology (ICIT)	2017	Canada
Block-Layer Reliability Method for Distribution Systems Under Various Operating Scenarios	X			X	X																							X						X		X			X		IEEE Transactions on Power Systems	2017	Finland
Reliability analysis method for microgrid with intermittent distributed generations			X	X	X	X				X	X									X											X				X		X		X		China International Conference on Electricity Distribution, CICED	2016	China
Incorporating multiple correlations among wind speeds, photovoltaic powers and bus loads in composite system reliability evaluation	X			X	X					X	X										X									X		X				X			X		Applied Energy	2013	China and Canada
Monte Carlo Based Operating Reserve Adequacy Evaluation of a Stand-Alone Microgrid Considering High Penetrations of Correlated Wind Energy			X	X	X	X					X											X							X	X					X		X		X		Proceedings - 2016 3rd International Conference on Information Science and Control Engineering, ICISCE	2016	China
Modeling and evaluation of supply reliability of microgrids including PV and wind power			X	X	X	X				X	X										X									X					X		X		X		EEE Power and Energy Society 2008 General Meeting: Conversion and Delivery of Electrical Energy in the 21st Century, PES	2008	Japan
The impact of capacity and location of multidistributed generator integrated in the distribution system on electrical line losses, reliability, and interruption cost			X	X						X	X	X											X	X											X	X			X		Environmental Progress & Sustainable Energy	2015	Thailand
Reliability analysis method for microgrid with intermittent distributed generations	X			X	X					X										X								X		X	X	X					X		X		China International Conference on Electricity Distribution, CICED	2016	China
Reliability evaluation of customers in a microgrid			X	X	X					X										X			X	X						X			X			X			X		IEEE Transactions on Power Systems	2008	Korea
Modeling and simulation of long term stochastic assessment in industrial microgrids proficiency considering renewable resources and load growth			X	X	X	X				X	X									X			X	X			X				X	X	X	X		X			X		Simulation Modelling Practice and Theory	2017	Iran
A new approach for fault detection in digital relays-based power system using Petri nets				X	X						X																			X	X	X					X		X		2010 Joint International Conference on Power Electronics, Drives and Energy Systems, PEDES 2010 and 2010 Power India	2010	Iran
Research on the Improved Reliability Evaluation Method of Active Distribution System	X			X	X	X				X	X										X		X	X						X			X				X		X		IOP Conference Series: Materials Science and Engineering	2018	China
Impact of wind speed modelling on the predictive reliability assessment of windbased microgrids			X	X	X						X									X			X	X									X			X			X		IET Renewable Power Generation	2019	Saudi Arabia and USA
Reliability assessment of load points including solar and wind DGs			X	X	X					X	X			X	X	X					X							X					X				X		X		2015 International Symposium on Smart Electric Distribution Systems and Technologies, EDST	2015	Saudi Arabia
Reliability Assessment of Microgrid with Renewable Generation and Prioritized Loads			X	X	X					X	X			X	X		X			X			X	X	X			X	X				X				X		X		2016 IEEE Green energy and system conference	2016	Canada
A Monte Carlo simulation approach to determine critical buses in islanded microgrids			X	X	X												X				X									X	X	X					X		X		IET Conference Publications	2016	Brazil
Reliability of islanded microgrids with stochastic generation and prioritized load			X	X	X					X							X				X		X	X				X							X		X		X		2009 IEEE Bucharest PowerTech: Innovative Ideas Toward the Electrical Grid of the Future	2009	UAE and USA
Effects of load estimation error on small-scale off-grid photovoltaic system design, cost and reliability			X	X	X	X				X							X			X								X				X				X			X		Energy for Sustainable Development	2016	Zambia and Scotland
Reliability evaluation of islanded microgrids with stochastic distributed generation			X	X	X					X							X			X			X	X											X		X		X		2009 IEEE Power and Energy Society General Meeting, PES '09	2009	UAE
Reliability assessment of microgrids with renewable generation by an hybrid model			X	X		X				X	X		X					X		X			X	X			X	X	X				X				X		X		2015 IEEE Eindhoven PowerTech, PowerTech	2015	Brazil
Reliability assessment of a microgrid distribution system with pv and storage			X	X		X				X								X		X			X	X		X	X	X					X				X		X		2015 International Symposium on Smart Electric Distribution Systems and Technologies, EDST	2015	Saudi Arabia
Reliability Studies of Modern Distribution Systems Integrated With Renewable Generation and Parking Lots			X	X	X	X				X	X		X						X			X	X						X			X				X			X		IEEE Transactions on Sustainable Energy	2016	Iran
Predictive based Reliability analysis of Electrical Hybrid Distributed Generation			X	X		X				X								X		X											X				X		X		X		International Conference on Science and Technology	2015	Iran, France and Thailand
Reliability assessment of distribution system with the integration of renewable distributed generation			X	X	X	X				X	X							X		X			X	X					X		X		X			X			X		Applied Energy	2017	South Africa
Energy Storage System Sizing Based on a Reliability Assessment of Power Systems Integrated with Wind Power			X	X	X	X					X							X												X	X	X				X			X		Sustainability	2017	China
Reliability evaluation of distribution systems with mobile energy storage systems			X	X	X	X					X							X		X	X					X				X		X				X			X		IET Renewable Power Generation	2016	Australia, China and Hong Kong
Reliability evaluation of a distribution network with microgrid based on a combined power generation system			X	X	X	X													X		X		X	X			X			X			X			X			X		Energies	2015	China
Reliability evaluation of distribution systems including vehicle-to-home and vehicle-to-grid			X	X	X	X													X		X		X	X			X			X					X	X			X		IEEE Transactions on Power Systems	2016	Hong Kong and Canada
Exact approach for charging of PEVs with V2G capability to improve micro-grid reliability			X	X	X	X					X								X												X				X	X			X		IET Generation, Transmission and Distribution	2019	Iran
Reliability evaluation of multi-energy microgrids: Energy storage devices effects analysis			X	X	X	X					X		X					X			X					X					X			X			X		X		Energy Procedia	2019	China and Hong Kong
Reliability evaluation of an aggregate battery energy storage system in microgrids under dynamic operation			X	X	X	X				X								X		X											X				X	X			X		International Journal of Electrical Power and Energy Systems	2020	Taiwan
Probabilistic modeling of energy storage to quantify market constrained reliability value to active distribution systems			X	X	X	X				X								X			X		X	X						X			X			X			X		IEEE Transactions on Sustainable Energy	2020	Canada
An Evaluation Strategy for Microgrid Reliability Considering the Effects of Protection System			X	X			X			X	X									X											X				X	X			X		IEEE Transactions on Power Delivery	2016	USA and China
Reliability Analysis of Distribution Systems with Photovoltaic Generation Using a Power Flow Simulator and a Parallel Monte Carlo Approach			X	X			X			X											X		X	X		X			X			X				X			X		Energies	2016	Spain
Modelling and evaluation of microgrids reliability and operational performance and its impact on service quality			X	X			X			X	X	X									X										X				X	X			X		European Transaction on Electrical Power	2010	Greece
Probabilistic reliability evaluation for distribution systems with DER and microgrids			X				X														X		X			X									X		X		X		2006 9th International Conference on Probabilistic Methods Applied to Power Systems, PMAPS	2006	Scotland and Sweden
A reliability evaluation method for distribution system with microgrids			X				X													X			X	X		X	X			X			X				X		X		Asia-Pacific Power and Energy Engineering Conference, APPEEC	2012	China
Improvement of Reliability in Active Networks with Intentional Islanding			X				X														X		X	X						X				X			X		X		2004 IEEE International Conference on Electric Utility Deregulation, Restructuring and Power Technologies. Proceedings	2004	Italy
Evaluation of Operational Reliability of a Microgrid Using a Short-Term Outage Model			X	X			X			X	X									X			X	X				X							X	X			X		IEEE Transactions On Power Systems	2014	China and USA
Predictive Analysis of Microgrid Reliability Using a Probabilistic Model of Protection System Operation			X	X			X			X	X									X			X	X				X							X	X			X		IEEE Transactions on Power Systems	2016	USA and China
On Exploring Potential Reliability Gains under Islanding Operation of Distributed Generation			X	X			X			X	X										X		X	X				X			X		X			X			X		IEEE Transactions on Smart Grid	2016	Australia and Iran
Assessment of the Impact of Microgrid Control Strategies in the Power Distribution Reliability Indices			X	X				X			X										X		X	X								X				X			X		Journal of Control, Automation and Electrical Systems	2017	Brazil
Impacts of island load shedding and restoration strategies on reliability of microgrid in distribution system			X	X				X		X	X										X		X	X			X					X	X				X		X		2016 IEEE PES Asia-Pacific Power and Energy Conference	2016	China
A contingency based energy management strategy for multi-microgrids considering battery energy storage systems and electric vehicles			X	X				X		X	X								X		X		X	X	X								X			X			X		Journal of Energy Storage	2020	Iran
Reliability Evaluation of Distribution System with Microgrids Considering Power Control Mode			X	X				X		X										X			X	X	X								X			X			X		Australian Journal of Electrical and Electronics Engineering	2013	China
Reliability analysis of distribution systems considering service restoration			X					X												X			X	X										X			X		X		2015 IEEE Power & Energy Society Innovative Smart Grid Technologies Conference (ISGT)	2015	USA and China
Reliability Analysis of a Decentralized Microgrid Control Architecture			X					X												X											X				X	X			X		EEE Transactions on Smart Grid	2019	USA
A system-of-systems framework for the reliability analysis of distributed generation systems accounting for the impact of degraded communication networks			X	X					X												X							X		X		X				X			X		Applied Energy	2016	Hong Kong, China, France and Italy
Impacts of direct cyber-power interdependencies on smart grid reliability under various penetration levels of microturbine/wind/solar distributed generations			X	X					X	X	X																			X					X	X			X		IET Generation, Transmission & Distribution	2016	Iran
Impact of cyber-physical system vulnerability, telecontrol system availability and islanding on distribution network reliability			X						X											X			X	X		X									X	X			X		Sustainable Energy, Grids and Networks	2016	Italy
Reliability assessment of a cyber physical microgrid system in island mode			X	X					X		X										X		X	X						X			X			X			X		CSEE Journal of Power and Energy Systems	2019	China
			79	83	53	38	11	7	8	43	38	4		4	3	2	5	11	5	41	40	4	54	50	7	11	17	24	11	32	27
										29																						19	29	15	34	91	50	6	99	41

## Sheet: By year
Year	Frequency
1971	1
1988	1
1992	1
1994	3
1999	1
2000	1
2001	2
2002	1
2004	2
2005	3
2006	1
2008	2
2009	3
2010	4
2011	2
2012	7
2013	7
2014	16
2015	23
2016	31
2017	15
2018	6
2019	8
2020	6

## Sheet: System Where it was Focused
	Microgrids
	If	79
	Not	20
										Type DG									PV
	DG									PV	43								If	43
	If	83								WTG	38								Not	40
	Not	16								Both	29
																			WTG
																			If	38
																			Not	45
																			BOTH
																			If	29
																			Not	54
	Load
	If	53
	Not	46
	ESS									Type ESS
	If	38								Batteries	11
	Not	61								Electric Vehicles	5
	PS
	If	11
	Not	88
	CS
	If	7
	Not	92
	ICTS
	If	8
	Not	91

## Sheet: What Technique Did They Use 
	What Technique Did They Use?
	Analytical	41
	SMCS	40
	NSMCS	4
	What reliability indices did they calculate?
	SAIFI	54
	SAIDI	50
	CAIFI	7
	CAIDI	11
	ASAI	17
	ENS	24
	AENS	11
	EENS	32
	Others	27

## Sheet: Types of Publications
	Journal Name
	Renewable and Sustainable Energy Reviews	15
	IEEE Transactions on Power Systems	12
	Electric Power Systems Research	4
	Applied Energy	4
	International Journal of Electrical Power and Energy Systems	4
	Energies	3
	IEEE Transactions on Smart Grid	3
	IEEE Transactions on Power Delivery	3
	Journal of Modern Power Systems and Clean Energy	3
	IET Renewable Power Generation	3
	Electric Power Components and Systems	3
	IEEE Power and Energy Magazine	2
	Smart Grid and Renewable Energy	2
	IEEE Transactions on Sustainable Energy	2
	Journal of Electrical Engineering and Technology	2
	International Transactions on Electrical Energy Systems	2
	Journal of Power Sources	2
	AIMS Energy	1
	Energy	1
	International Journal of Distributed Sensor Networks	1
	The Electricity Journal	1
	IEEE Access	1
	Applied Soft Computing Journal	1
	European Transaction on Electrical Power	1
	Journal of Control, Automation and Electrical Systems	1
	Journal of Energy Storage	1
	Australian Journal of Electrical and Electronics Engineering	1
	IET Generation, Transmission & Distribution	1
	Sustainable Energy, Grids and Networks	1
	CSEE Journal of Power and Energy Systems	1
	International Journal of Critical Infrastructures	1
	Journal of Modern Power Systems and Clean Energy	1
	Environmental Progress & Sustainable Energy	1
	Simulation Modelling Practice and Theory	1
	Energy for Sustainable Development	1
	Types of Publications
	Articles	99
	Reviews	41
	Document Type
	Journal Article	91
	Conference proceedings	50
	Book	5

## Sheet: Countries
		Countries of publication
		China	37
		USA	31
		Canada	21
		Iran	14
		India	9
		Italy	8
		Spain	7
		England	6
		Denmark	4
		Sweden	4
		Brazil	4
		Hong Kong	4
		Australia	3
		Malaysia	3
		South Korea	3
		Turkey	2
		Greece	2
		Finland	2
		Saudi Arabia	2
		Germany	2
		Portugal	2
		Thailand	2
		UAE	2
		Scotland	2
		France	2
		Ireland	1
		Egypt	1
		Qatar	1
		Netherlands	1
		Ethopia	1
		Syria	1
		Israel	1
		Belgium	1
		Romania	1
		Vietnam	1
		Japan	1
		Zambia	1
		Algeria	1
		South Africa	1
		Switzerland	1
		40
